# Supplementary material for: Degradation of Human Serum Albumin by Infrared Free Electron Laser Enhanced by Inclusion of a Salen-Type Schiff Base Zn (II) Complex
Source: PubMed Central journal article supplement (PMC7037271; doi:10.3390/ijms21030874), 2020-01-29
Supplement: ijms-21-00874-s001.pdf [file ijms-21-00874-s001.pdf]

## SUPPLEMENTARY MATERIAL

**Table S1.** Comparison of the calculated harmonic wavenumbers ( $\nu^{\text{cal}}$ ,  $\text{cm}^{-1}$ ), absolute (A) and relative infrared intensities (A, %), reduce masses ( $\mu$ ), force constants (f,  $\text{mDyne}/\text{\AA}$ ), scaled wavenumbers ( $\nu^{\text{scal}}$ ,  $\text{cm}^{-1}$ ), experimental wavenumbers by IR ( $\nu^{\text{exp}}$ ), and characterization obtained in the ZnL molecule at the B3LYP/6-31G(d,p) level.

| Theoretical        |    |                  |       |      |                        | Experimental       | Characterization                                                                                                  |
|--------------------|----|------------------|-------|------|------------------------|--------------------|-------------------------------------------------------------------------------------------------------------------|
| $\nu^{\text{cal}}$ | A  | A <sup>a</sup> % | $\mu$ | f    | $\nu^{\text{scal, b}}$ | $\nu^{\text{exp}}$ |                                                                                                                   |
| 433.9              | 31 | 2                | 4.3   | 0.47 | 429                    | 426 vw             | 60% $\gamma(\text{C-N})$                                                                                          |
| 462.2              | 28 | 2                | 5.7   | 0.72 | 457                    |                    | 70%, $\delta(\text{ZnO}_2\text{N}_2 \text{ group})$                                                               |
| 462.6              | 1  | 0                | 4.8   | 0.60 | 457                    | 458 w              | 40%, $\delta(\text{ZnO}_2\text{N}_2 \text{ group})$                                                               |
| 476.4              | 11 | 1                | 4.2   | 0.56 | 471                    | 472 w              | 43%, $\delta(\text{ZnO}_2\text{N}_2 \text{ group}) + 30\%$ , 16b $\gamma(\text{CCC})$ in benzene ring             |
| 484.7              | 3  | 0                | 3.6   | 0.50 | 479                    | 495 vw             | 54%, 16b $\gamma(\text{CCC})$ in benzene ring                                                                     |
| 552.2              | 1  | 0                | 3.4   | 0.61 | 545                    | 536 w              | 63%, 16a $\gamma(\text{CCC})$ in benzene ring                                                                     |
| 554.3              | 3  | 0                | 3.4   | 0.61 | 547                    |                    | 63%, 16a $\gamma(\text{CCC})$ in benzene ring                                                                     |
| 556.0              | 6  | 0                | 4.8   | 0.87 | 549                    | 553 w              | 60% $\gamma(\text{O-Zn-O}) + 20\%$ , $\delta(\text{CCC})$ in benzene ring                                         |
| 559.4              | 6  | 0                | 4.9   | 0.90 | 552                    | 564 w              | 60% $\gamma(\text{O-Zn-O}) + 20\%$ , $\delta(\text{CCC})$ in benzene ring                                         |
| 598.1              | 2  | 0                | 5.6   | 1.19 | 590                    | 594 m              | 70% $\delta_s(\text{O-Zn-O}) + 20\%$ , 6a $\delta(\text{CCC})$ in benzene ring                                    |
| 610.2              | 67 | 5                | 8.3   | 1.82 | 602                    | 588 m              | 73% $\delta_{\text{as}}(\text{O-Zn-O}) + 20\%$ , 6a $\delta(\text{CCC})$ in benzene ring                          |
| 624.7              | 2  | 0                | 5.7   | 1.30 | 616                    | 618 m              | 43% $\delta(\text{O-Zn-O}) + 30\%$ , 6a $\delta(\text{CCC})$ in benzene ring                                      |
| 652.2              | 9  | 1                | 5.6   | 1.41 | 643                    | 646, 640 w         | 60%, 6a $\delta(\text{CCC})$ in benzene ring                                                                      |
| 676.8              | 3  | 0                | 4.4   | 1.19 | 667                    | 671 m              | 40%, $\delta(\text{C-C-N}) + 30\%$ , 6a $\delta(\text{CCC})$ in benzene ring                                      |
| 751.0              | 2  | 0                | 2.9   | 0.97 | 740                    |                    | 83%, 6b $\gamma(\text{CCC})$ in benzene ring                                                                      |
| 752.2              | 0  | 0                | 2.9   | 0.98 | 741                    | 739 m              | 83%, 6b $\gamma(\text{CCC})$ in benzene ring                                                                      |
| 766.6              | 66 | 5                | 1.4   | 0.48 | 756                    | 749 s              | 95%, 11 $\gamma(\text{C-H})$ in benzene ring                                                                      |
| 766.7              | 23 | 2                | 1.4   | 0.48 | 756                    |                    | 95%, 11 $\gamma(\text{C-H})$ in benzene ring                                                                      |
| 773.3              | 2  | 0                | 1.3   | 0.48 | 762                    | 761 m              | 65% $\gamma(\text{C-H})$ in C36H <sub>2</sub> + 30% $\gamma(\text{C-H})$ in C30H <sub>2</sub> , C33H <sub>2</sub> |
| 795.8              | 0  | 0                | 4.6   | 1.71 | 784                    |                    | 35% $\nu(\text{O-Zn-O}) + 25\% \delta(\text{CCO}) + 20\% \delta(\text{CCC})$ in benzene ring                      |
| 804.6              | 17 | 1                | 4.4   | 1.67 | 793                    | 793 m              | 35% $\nu(\text{O-Zn-O}) + 25\% \delta(\text{CCO}) + 20\% \delta(\text{CCC})$ in benzene ring                      |
| 852.8              | 0  | 0                | 3.5   | 1.50 | 840                    | 844 w              | 60% $\delta(\text{C-N}) + 25\% \delta(\text{O-Zn-O})$                                                             |
| 870.9              | 10 | 1                | 1.6   | 0.71 | 858                    | 850 m              | 90%, 17b $\gamma(\text{C-H})$ in benzene ring                                                                     |
| 871.4              | 4  | 0                | 1.6   | 0.72 | 858                    | 857 w              | 90%, 17b $\gamma(\text{C-H})$ in benzene ring                                                                     |
| 914.5              | 60 | 5                | 5.6   | 2.77 | 901                    | 905 m              | 60%, 12 $\delta(\text{CCC}) + 30\%$ , $\delta(\text{C-O})$                                                        |
| 920.3              | 3  | 0                | 4.9   | 2.45 | 906                    |                    | 60%, 12 $\delta(\text{CCC}) + 30\%$ , $\delta(\text{C-O})$                                                        |
| 942.3              | 1  | 0                | 1.3   | 0.68 | 928                    | 937 m              | 85%, 17a $\gamma(\text{C-H})$ in benzene ring                                                                     |
| 942.7              | 0  | 0                | 1.3   | 0.68 | 928                    |                    | 85%, 17a $\gamma(\text{C-H})$ in benzene ring                                                                     |
| 968.5              | 9  | 1                | 2.0   | 1.08 | 954                    | 942 vw             | 95% $\gamma(\text{C-H})$ in CH <sub>2</sub>                                                                       |
| 991.4              | 0  | 0                | 1.3   | 0.74 | 976                    | 969 vv             | 85%, 5 $\gamma(\text{C-H})$ in benzene ring                                                                       |
| 991.4              | 0  | 0                | 1.3   | 0.74 | 976                    |                    | 85%, 5 $\gamma(\text{C-H})$ in benzene ring                                                                       |
| 1002.2             | 7  | 1                | 1.6   | 0.97 | 987                    | 982 w              | 70%, $\gamma(\text{C-H})$ in C9H, C15H                                                                            |
| 1010.6             | 10 | 1                | 1.5   | 0.92 | 995                    | 995 vw             | 70%, $\gamma(\text{C-H})$ in C9H, C15H                                                                            |
| 1020.1             | 5  | 0                | 2.3   | 1.42 | 1004                   | 1012 w             | 40%, $\nu(\text{C30-N, C33-N}) + 30\% \nu(\text{C=N}) + \delta(\text{C-H})$ in benzene ring                       |
| 1055.4             | 10 | 1                | 2.2   | 1.48 | 1039                   | 1036 m             | 85%, 18b $\delta(\text{C-H})$ in benzene ring                                                                     |
| 1056.3             | 1  | 0                | 2.2   | 1.44 | 1040                   | 1040 w             | 85%, 18b $\delta(\text{C-H})$ in benzene ring                                                                     |
| 1098.5             | 5  | 0                | 3.9   | 2.80 | 1081                   | 1071 w             | 60%, $\nu(\text{C30-N, C33-N}) + 25\% \delta(\text{C-H})$ in CH <sub>2</sub>                                      |
| 1113.0             | 3  | 0                | 2.2   | 1.57 | 1095                   | 1118 w             | 60%, $\nu(\text{C-C30-C})$                                                                                        |
| 1123.4             | 36 | 3                | 3.3   | 2.42 | 1106                   | 1131 vw            | 60%, $\nu(\text{C30-N, C33-N}) + 25\% \delta(\text{C-H})$ in CH <sub>2</sub>                                      |
| 1157.6             | 32 | 2                | 1.6   | 1.29 | 1139                   | 1137 m             | 85%, 15 $\delta(\text{C-H})$ in benzene ring                                                                      |
| 1161.4             | 5  | 0                | 1.7   | 1.33 | 1143                   |                    | 85%, 15 $\delta(\text{C-H})$ in benzene ring                                                                      |
| 1181.7             | 16 | 1                | 1.1   | 0.92 | 1163                   |                    | 90%, 9a $\delta(\text{C-H})$ in benzene ring                                                                      |
| 1183.0             | 44 | 3                | 1.1   | 0.93 | 1164                   | 1157 m             | 90%, 9a $\delta(\text{C-H})$ in benzene ring                                                                      |
| 1229.6             | 49 | 4                | 2.3   | 2.01 | 1210                   | 1202 s             | 80%, 9b $\delta(\text{C-C, C-H})$ in benzene ring                                                                 |

|        |      |     |     |       |      |             |                                                                                                                                       |
|--------|------|-----|-----|-------|------|-------------|---------------------------------------------------------------------------------------------------------------------------------------|
| 1230.6 | 20   | 2   | 2.4 | 2.17  | 1211 | 1212 m      | 80%, 9b $\delta(\text{C-C, C-H})$ in benzene ring                                                                                     |
| 1253.6 | 25   | 2   | 1.3 | 1.16  | 1233 | 1231 vw     | 65% $\delta(\text{C-H})$ in C30H <sub>2</sub> , C33H <sub>2</sub> + $\delta(\text{C-H})$ in benzene ring                              |
| 1255.0 | 27   | 2   | 1.2 | 1.14  | 1235 | 1244 vw     | 65% $\delta(\text{C-H})$ in C30H <sub>2</sub> , C33H <sub>2</sub> + $\delta(\text{C-H})$ in benzene ring                              |
| 1275.7 | 7    | 1   | 1.6 | 1.55  | 1255 | 1260 w      | 85% $\delta(\text{C-H})$ in CH <sub>2</sub>                                                                                           |
| 1278.6 | 14   | 1   | 1.6 | 1.54  | 1258 | 1271 w      | 70%, 3 $\delta(\text{C-H})$ in benzene ring                                                                                           |
| 1300.0 | 4    | 0   | 1.1 | 1.12  | 1279 | 1277 vw     | 53% $\delta_s(\text{C-H})$ in C30H <sub>2</sub> , C33H <sub>2</sub> + 45% $\delta_s(\text{C-H})$ in C36H <sub>2</sub>                 |
| 1364.4 | 22   | 2   | 2.0 | 2.23  | 1342 | 1310 s      | 60% $\delta_s(\text{C-H})$ in C30H <sub>2</sub> , C33H <sub>2</sub> + 15% $\delta_s(\text{C-H})$ in C36H <sub>2</sub>                 |
| 1369.5 | 92   | 7   | 1.7 | 1.83  | 1347 | 1324 w      | 50% $\delta_s(\text{C-H})$ in C30H <sub>2</sub> , C33H <sub>2</sub> + 35% $\delta_s(\text{C-H})$ in C36H <sub>2</sub>                 |
| 1371.6 | 0    | 0   | 4.0 | 4.44  | 1349 | 1346 sh     | 50%, $\nu(\text{C-O})$ + 40%, 19b $\nu(\text{C=C})$ in benzene ring                                                                   |
| 1380.3 | 58   | 4   | 1.5 | 1.66  | 1358 | 1340 m      | 65% $\delta_s(\text{C-H})$ in C36H <sub>2</sub> + 30% $\delta_s(\text{C-H})$ in C30H <sub>2</sub> , C33H <sub>2</sub>                 |
| 1400.2 | 35   | 3   | 1.3 | 1.47  | 1377 | 1351 sh     | 70% $\delta_s(\text{C-H})$ in C30H <sub>2</sub> , C33H <sub>2</sub> + 25% $\delta_s(\text{C-H})$ in C36H <sub>2</sub>                 |
| 1400.6 | 72   | 6   | 3.2 | 3.71  | 1378 | 1365 w      | 80%, 14 $\nu(\text{C=C})$ + $\delta(\text{C-H})$ in benzene ring                                                                      |
| 1404.6 | 1    | 0   | 2.9 | 3.32  | 1382 |             | 80%, 14 $\nu(\text{C=C})$ + $\delta(\text{C-H})$ in benzene ring                                                                      |
| 1436.5 | 109  | 8   | 1.6 | 1.89  | 1413 | 1400 m      | 70%, $\delta(\text{C-H})$ in C9H, C15H                                                                                                |
| 1438.8 | 1    | 0   | 1.6 | 1.94  | 1415 | 1423 m      | 70%, $\delta(\text{C-H})$ in C9H, C15H                                                                                                |
| 1489.2 | 120  | 9   | 2.9 | 3.84  | 1439 | 1449 s      | 50%, 19b $\nu(\text{C=C})$ + $\delta(\text{C-H})$ in benzene ring + 30% $\delta(\text{C-H})$ in C30H <sub>2</sub> , C33H <sub>2</sub> |
| 1494.6 | 44   | 3   | 1.2 | 1.56  | 1444 |             | 60%, $\delta_{as}(\text{C-H})$ in C36H <sub>2</sub> + 20% $\delta_{as}(\text{C-H})$ in C30H <sub>2</sub> , C33H <sub>2</sub>          |
| 1505.8 | 77   | 6   | 2.2 | 2.99  | 1455 |             | 60%, $\delta_{as}(\text{C-H})$ in C36H <sub>2</sub>                                                                                   |
| 1505.9 | 63   | 5   | 2.1 | 2.77  | 1455 |             | 70%, 19a $\nu(\text{C=C})$ + $\delta(\text{C-H})$ in benzene ring + $\delta(\text{C-H})$ in C36H <sub>2</sub>                         |
| 1507.2 | 64   | 5   | 2.2 | 2.88  | 1456 |             | 70%, 19a $\nu(\text{C=C})$ + $\delta(\text{C-H})$ in benzene ring + $\delta(\text{C-H})$ in C36H <sub>2</sub>                         |
| 1512.5 | 119  | 9   | 1.3 | 1.80  | 1461 | 1475 vs     | 85%, $\delta_{as}(\text{C-H})$ in CH <sub>2</sub>                                                                                     |
| 1517.1 | 38   | 3   | 1.4 | 1.93  | 1465 |             | 85%, $\delta_{as}(\text{C-H})$ in CH <sub>2</sub>                                                                                     |
| 1576.2 | 166  | 13  | 4.9 | 7.21  | 1521 | 1548 vs     | 80%, 8b $\nu(\text{C=C})$ in benzene ring                                                                                             |
| 1577.4 | 125  | 10  | 5.1 | 7.43  | 1522 |             | 80%, 8b $\nu(\text{C=C})$ in benzene ring                                                                                             |
| 1666.4 | 102  | 8   | 5.7 | 9.28  | 1606 | 1575 vs     | 70%, 8a $\nu(\text{C=C})$ in benzene ring                                                                                             |
| 1668.6 | 10   | 1   | 5.7 | 9.42  | 1608 | 1605 m      | 70%, 8a $\nu(\text{C=C})$ in benzene ring                                                                                             |
| 1683.8 | 1308 | 100 | 6.5 | 10.81 | 1622 | 1628 vs     | 78%, $\nu(\text{C9=N, C15=N})$                                                                                                        |
| 1701.2 | 190  | 15  | 6.8 | 11.62 | 1639 | 1647 vs     | 80%, $\nu(\text{C9=N, C15=N})$                                                                                                        |
|        |      |     |     |       |      | 1738 m      | $\nu(\text{CO})$                                                                                                                      |
|        |      |     |     |       |      | 2364,2356vs | $\nu(\text{C-H} \cdots \text{O})$ intermolecular                                                                                      |
| 3017.1 | 32   | 2   | 1.1 | 5.71  | 2880 | 2862 vw     | 100%, $\nu(\text{C-H})$                                                                                                               |
| 3017.5 | 55   | 4   | 1.1 | 5.71  | 2880 | 2875 vw     | 100%, $\nu(\text{C-H})$                                                                                                               |
| 3040.9 | 46   | 4   | 1.1 | 5.92  | 2902 |             | 100%, $\nu(\text{C-H})$                                                                                                               |
| 3041.5 | 35   | 3   | 1.1 | 5.92  | 2903 | 2910 w      | 100%, $\nu(\text{C-H})$                                                                                                               |
| 3048.1 | 75   | 6   | 1.1 | 5.81  | 2909 | 2918 w      | 100%, $\nu(\text{C-H})$                                                                                                               |
| 3069.8 | 6    | 0   | 1.1 | 6.11  | 2929 | 2931 sh     | 100%, $\nu(\text{C-H})$                                                                                                               |
| 3079.3 | 12   | 1   | 1.1 | 6.15  | 2938 | 2940 s      | 90%, $\nu_{as}(\text{C-H})$ in C30H <sub>2</sub> , C33H <sub>2</sub>                                                                  |
| 3099.4 | 56   | 4   | 1.1 | 6.25  | 2957 | 2970 m      | 70%, $\nu_{as}(\text{C-H})$ in C36H <sub>2</sub> + 30%, $\nu_{as}(\text{C-H})$ in C30H <sub>2</sub> , C33H <sub>2</sub>               |
| 3162.3 | 15   | 1   | 1.1 | 6.41  | 3016 |             | 92%, $\nu(\text{C-H})$ in H10, H22 of benzene ring                                                                                    |
| 3162.4 | 11   | 1   | 1.1 | 6.41  | 3017 |             | 92%, $\nu(\text{C-H})$ in H10, H22 of benzene ring                                                                                    |
| 3178.2 | 13   | 1   | 1.1 | 6.48  | 3031 |             | 100%, $\nu(\text{C-H})$                                                                                                               |
| 3178.2 | 17   | 1   | 1.1 | 6.48  | 3031 | 3037 m      | 95%, 20b $\nu(\text{C-H})$ in benzene ring                                                                                            |
| 3207.3 | 37   | 3   | 1.1 | 6.62  | 3059 | 3051 m      | 95%, 20b $\nu(\text{C-H})$ in benzene ring                                                                                            |
| 3207.4 | 5    | 0   | 1.1 | 6.62  | 3059 |             | 100%, $\nu(\text{C-H})$                                                                                                               |
| 3213.0 | 22   | 2   | 1.1 | 6.67  | 3064 | 3099 vw     | 100%, $\nu(\text{C-H})$                                                                                                               |
| 3213.1 | 11   | 1   | 1.1 | 6.67  | 3064 |             | 100%, $\nu(\text{C-H})$                                                                                                               |

<sup>a</sup>Normalized to the highest value. <sup>b</sup>With the scaling equation:  $\nu^{\text{scal}} = 3.3 + 0.9813 \nu^{\text{cal}}$  (for the 400-1450 cm<sup>-1</sup> range) and  $\nu^{\text{scal}} = 34.7 + 0.9429 \nu^{\text{cal}}$  (for the 1450- 3300 cm<sup>-1</sup> range).
